# Supplementary material
Source: PubMed Central journal article supplement (PMC6223262)
Supplement: NIHMS1506064-supplement-313142_Online_Supplement.pdf [file NIHMS1506064-supplement-313142_Online_Supplement.pdf]

## **Supplemental Material**

### **Microbial transplantation with human gut commensals containing CutC is sufficient to transmit enhanced platelet reactivity and thrombosis potential**

Sarah M. Skye<sup>1,2</sup>, Weifei Zhu<sup>1,2</sup>, Kymberleigh A. Romano<sup>1,2,3</sup>, Chun-Jun Guo<sup>4</sup>, Zeneng Wang<sup>1,2</sup>, Xun Jia<sup>1</sup>, Jennifer Kirsop<sup>1,2</sup>, Bridget Haag<sup>1</sup>, Jennifer Lang<sup>5</sup>, Joseph A. DiDonato<sup>1,2</sup>, W.H. Wilson Tang<sup>1,2,6</sup>, Aldons J. Lusic<sup>5</sup>, Federico E. Rey<sup>3</sup>, Michael A. Fischbach<sup>4</sup>, and Stanley L. Hazen<sup>1,2,6</sup>

<sup>1</sup>Department of Cellular & Molecular Medicine, Lerner Research Institute, Cleveland Clinic, Cleveland, OH 44195, USA

<sup>2</sup>Center for Microbiome & Human Health, Lerner Research Institute, Cleveland Clinic, Cleveland, OH 44195, USA

<sup>3</sup>Department of Bacteriology, University of Wisconsin-Madison, Madison, WI 53706, USA

<sup>4</sup>Department of Bioengineering and ChEM-H, Stanford University, Stanford, CA 94305, USA.

<sup>5</sup>Departments of Human Genetics and Medicine, David Geffen School of Medicine, University of California, Los Angeles, Los Angeles, CA 90095, USA

<sup>6</sup>Department of Cardiovascular Medicine, Cleveland Clinic, Cleveland, OH 44195, USA

Short Title: Microbial transplantation confers thrombosis risk

Correspondence: Stanley L. Hazen, 9500 Euclid Ave, NC-10, Lerner Research Institute, Cleveland Clinic, Cleveland, OH 44195. Email: [Hazens@ccf.org](mailto:Hazens@ccf.org)

## Online Figure I

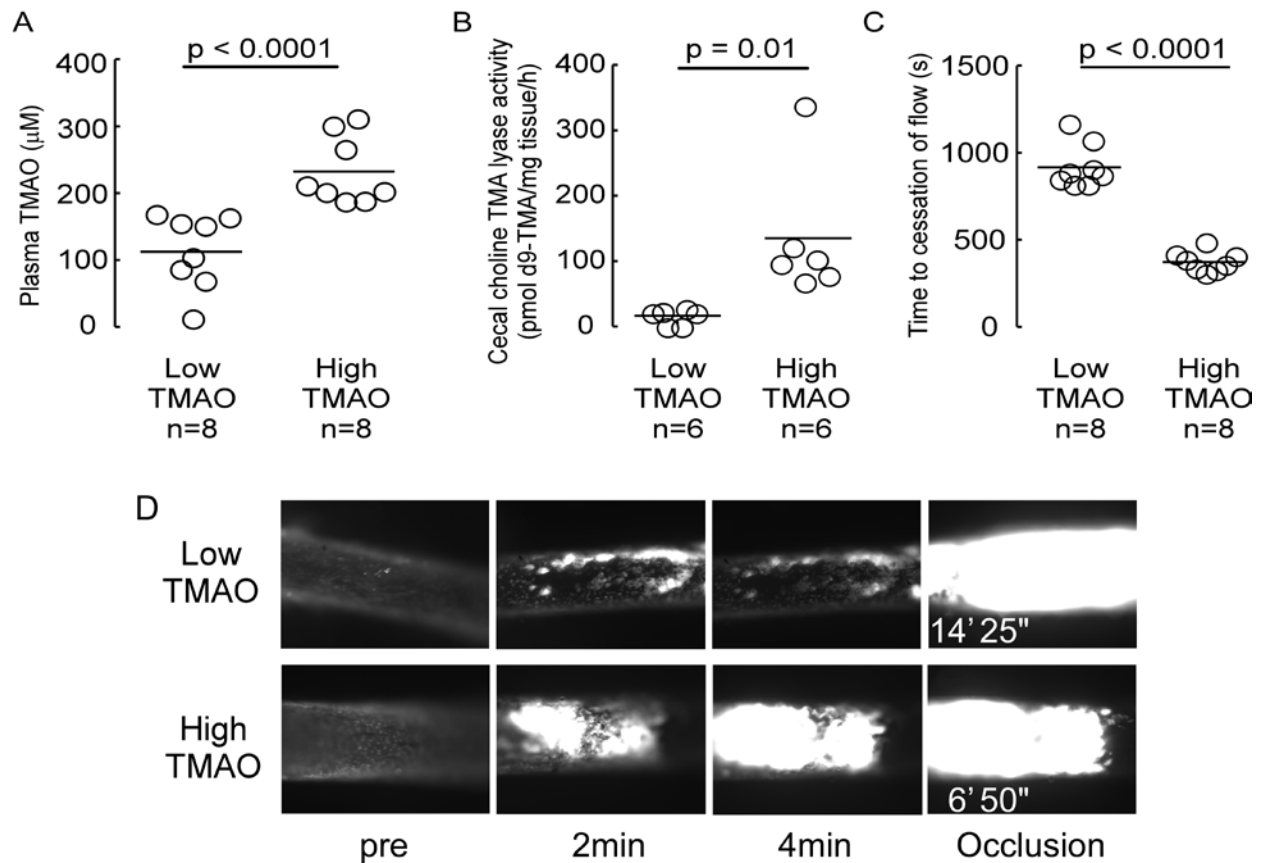

**Online Figure I. Human fecal microbial transplantation study demonstrating transmission of TMAO generation and thrombosis potential *in vivo*** Recipient mice were placed on a choline supplemented diet. Five days post-transplant, blood was collected, tissues harvested and *in vivo* thrombosis potential ( $\text{FeCl}_3$  carotid injury model) was assessed as described under Methods. A) Plasma TMAO was measured by LC/MS/MS. B) Cecal choline TMA-lyase activity was determined by LC/MS/MS as described under Methods. C) Time to cessation of blood flow determined through *in vivo* thrombosis carotid injury model. D) Example clot formation images are shown. P-values were determined by two-tailed unpaired t-test with Welch's correction.

## Online Figure II

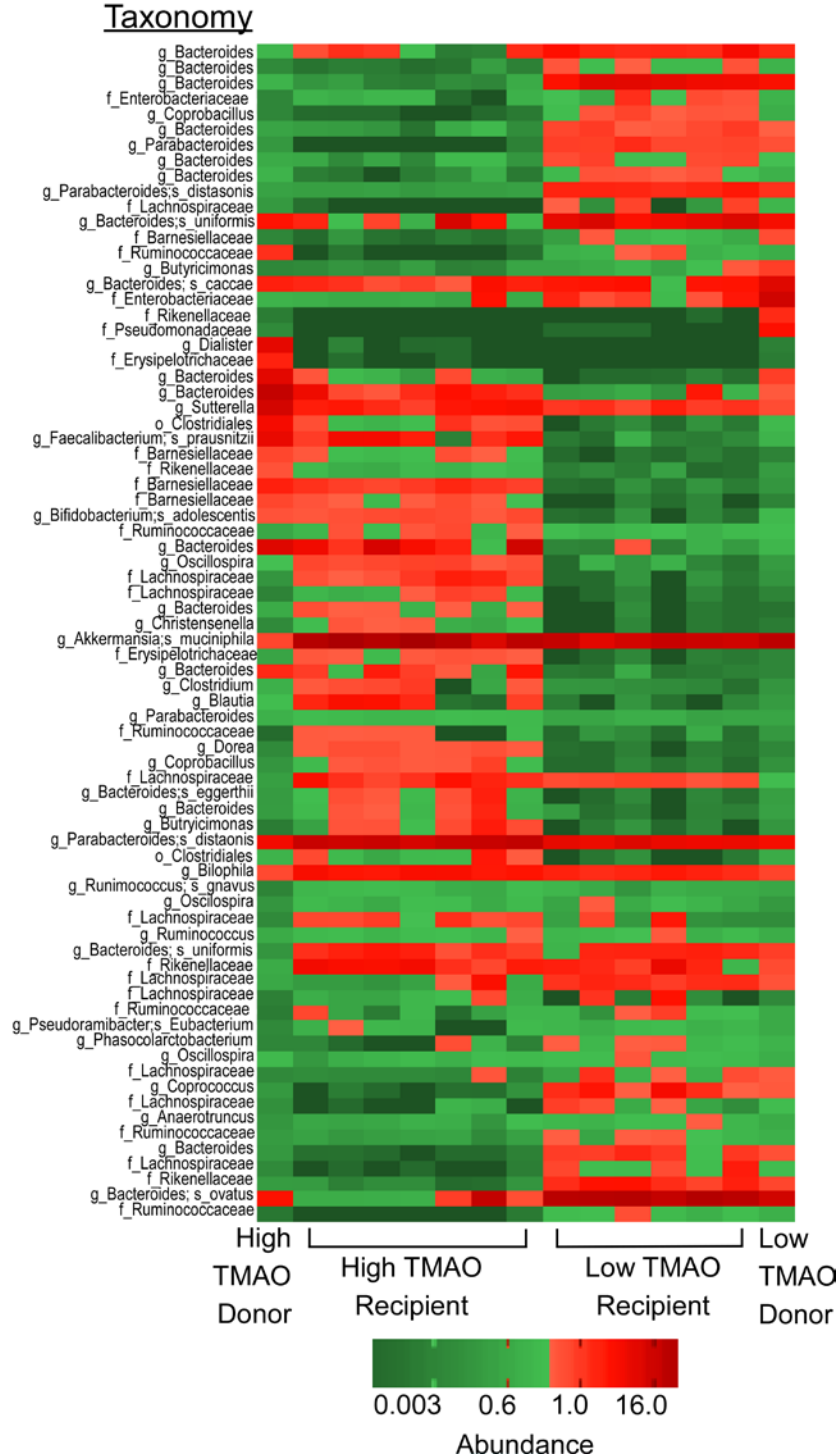

**Online Figure II. Heatmap of microbiota present in human fecal transplant to germ-free recipients.** Heatmap of individual taxa and donor or recipient microbiota showing more abundant microbes in red and less abundant microbes in green. Taxa (or OTUs as indicated) are organized based on weighted unfrac distances using the statistical packages phyloseq, vegan, and DESeq2 in R.
